# Supplementary material for: The enteric nervous system and the musculature of the colon are altered in patients with spina bifida and spinal cord injury
Source: PubMed Central journal article supplement (PMC5306076; doi:10.1007/s00428-016-2060-4), 2017-01-06
Supplement: 428_2016_2060_MOESM4_ESM.pdf [file 428_2016_2060_MOESM4_ESM.pdf]

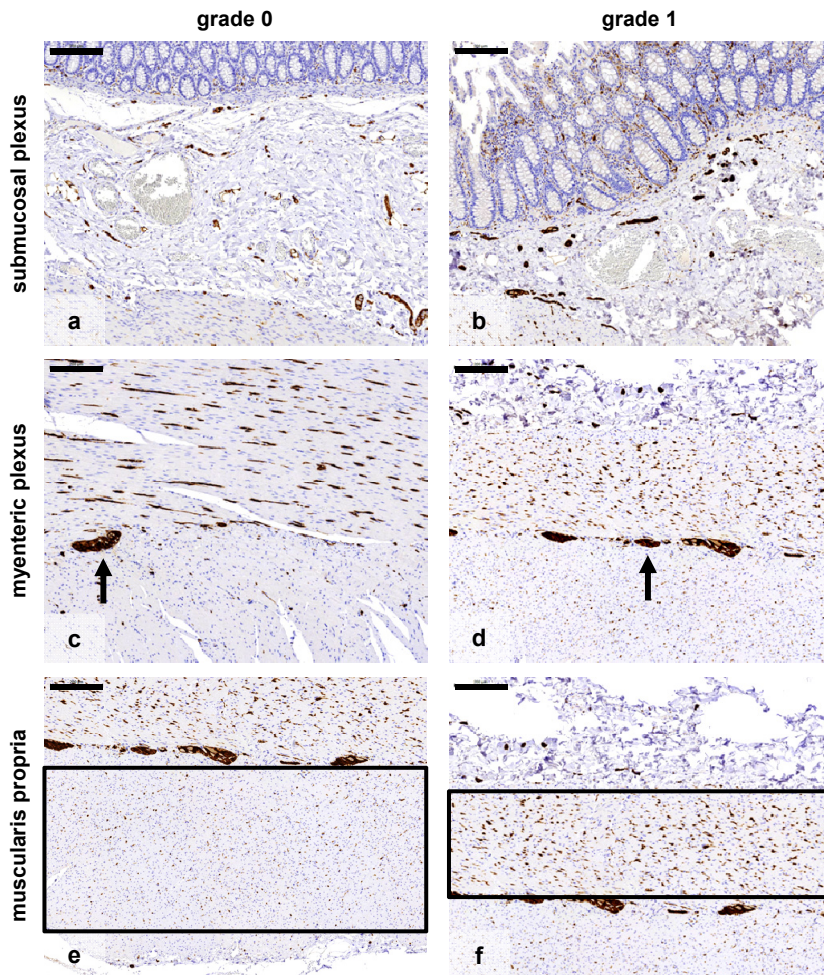

### Suppl. Fig. 3

Semiquantitative scoring of S100 stained sections. The density of nerve fibres was assessed in the submucosal plexus (a, b), the myenteric plexus (arrows) (c, d) and the muscularis propria (area within *rectangle*) (e, f) as follows: no or low density (0) and high density of S100 positive fibres (1). *Scalebars* 200  $\mu$ m

### Neuromuscular changes in the colon in spina bifida and spinal cord injury: a nationwide histology study

Corresponding author: [Marjanne.denBraber-Ymker@radboudumc.nl](mailto:Marjanne.denBraber-Ymker@radboudumc.nl)  
*Virchows Archiv*
