# Supplementary material for: The enteric nervous system and the musculature of the colon are altered in patients with spina bifida and spinal cord injury
Source: Springer Nature journal article supplement (doi:10.1007/s00428-016-2060-4), 2017-01-06
Supplement: MOESM3 [file 11980970]

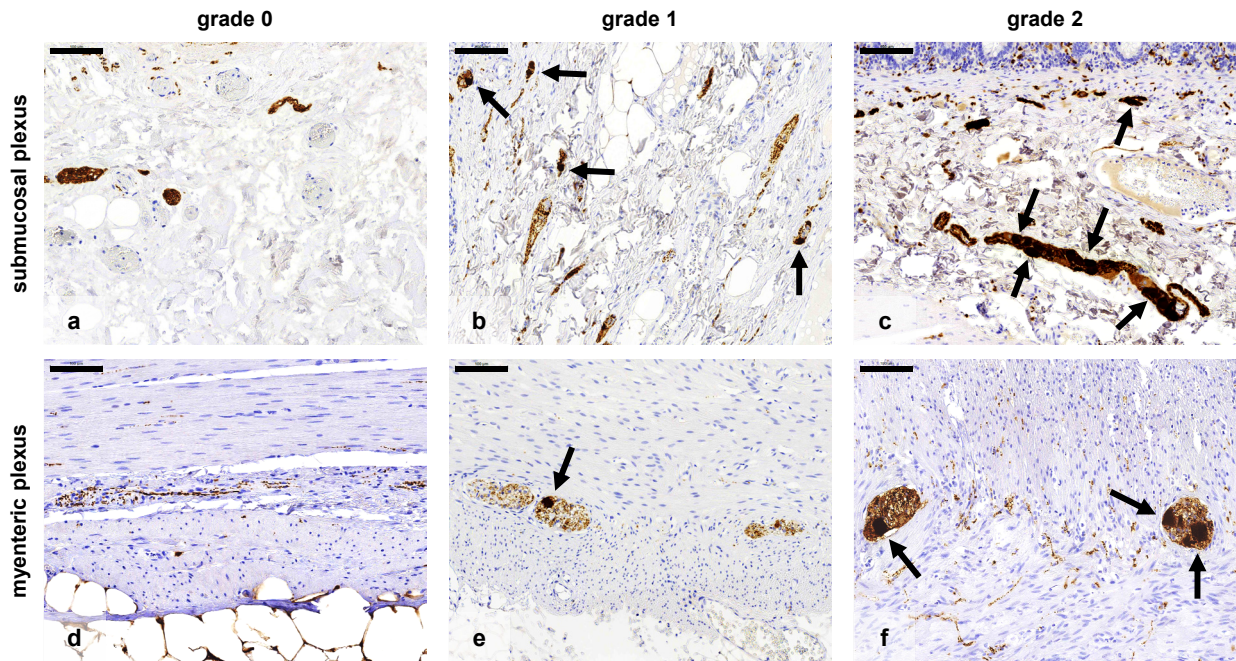

### Suppl. Fig. 2

Semiquantitative scoring of calretinin stained sections. The number of neurons was estimated in relation to the present plexus: no neurons (0), on average less than one neuron per neuronal structure (1), minimal one neuron per neuronal structure (2). Neurons are indicated with *arrows*. *Scalebars* 100  $\mu$ m

### Neuromuscular changes in the colon in spina bifida and spinal cord injury: a nationwide histology study

Corresponding author: [Marjanne.denBraber-Ymker@radboudumc.nl](mailto:Marjanne.denBraber-Ymker@radboudumc.nl)  
*Virchows Archiv*
