# Supplementary material for: The enteric nervous system and the musculature of the colon are altered in patients with spina bifida and spinal cord injury
Source: Springer Nature journal article supplement (doi:10.1007/s00428-016-2060-4), 2017-01-06
Supplement: MOESM5 [file 11980970]

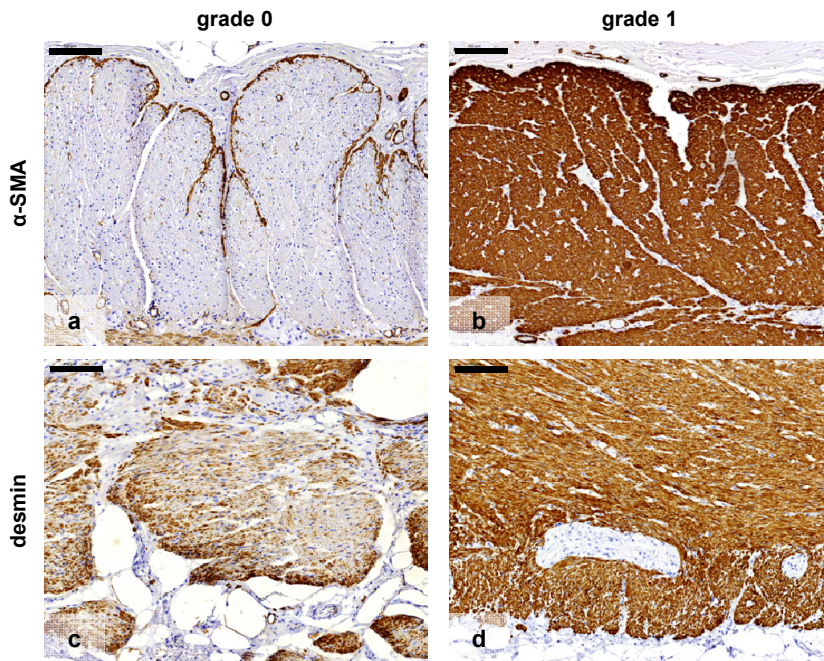

#### Suppl. Fig. 4

Semiquantitative scoring of  $\alpha$ -Smooth muscle actin (SMA) (a, b) and desmin (c, d) stained sections. Staining intensities were scored as follows: no or weak staining (0) and strong staining intensity (1). Internal references for  $\alpha$ -SMA and desmin were respectively immunoreactivity within the blood vessel wall and muscularis mucosae (1). Scalebars 100  $\mu$ m

**Neuromuscular changes in the colon in spina bifida and spinal cord injury: a nationwide histology study**

Corresponding author: [Marjanne.denBraber-Ymker@radboudumc.nl](mailto:Marjanne.denBraber-Ymker@radboudumc.nl)  
Virchows Archiv
